# Supplementary material
Source: ML conference proceedings conference paper supplement (https://proceedings.neurips.cc/paper_files/paper/2017/hash/02f039058bd48307e6f653a2005c9dd2-Abstract.html)
Supplement: Supplementary file [file 02f039058bd48307e6f653a2005c9dd2-Supplemental.zip]

## A Guarantees on Bootstrapped Samples

In this section we prove that the samples generated in Algorithm 1, through the nearest neighbor bootstrap, are close to samples generated from  $f^{CI}(x, y, z) = f_{X|Z}(x|z)f_{Y|Z}(y|z)f_Z(z)$ . The *closeness* is characterized in terms of total variational distance as in Theorem 1. Suppose  $2n$  i.i.d samples from distribution  $f(x, y, z)$  are supplied to Algorithm 1. Consider a typical sample  $(X, Y, Z) \sim f(x, y, z)$ , which is modified to produce a typical sample in  $\mathcal{U}'_2$  (refer to Algorithm 1) denoted by  $(X, Y', Z)$ . Here,  $Y'$  are the  $Y$ -coordinates of a sample  $(X', Y', Z')$  in  $\mathcal{U}_2$  such that  $Z'$  is the nearest neighbor of  $Z$ . Let us denote the marginal distribution of a typical sample in  $\mathcal{U}'_2$  by  $\phi_{X,Y,Z}(x, y, z)$ , i.e  $(X, Y', Z) \sim \phi_{X,Y,Z}(x, y, z)$ . Now we are at a position to prove Theorem 1.

*Proof of Theorem 1.* Let  $f_{Z'|z}(z')$  denote the conditional p.d.f of the variable  $Z'$  (that is the nearest neighbor of sample  $Z$  in  $\mathcal{U}_2$ ), conditioned on  $Z = z$ . Therefore, the distribution of the new-sample is given by,

$$\phi_{X,Y,Z}(x, y, z) = f_{X|Z}(x|z)f_Z(z) \int f_{Y|Z}(y|z')f_{Z'|z}(z')dz'. \quad (4)$$

We want to bound the total variational distance between  $\phi_{X,Y,Z}(x, y, z)$  and  $f^{CI}_{X,Y,Z}(x, y, z)$ . We have the following chain:

$$\begin{aligned} 2 * d_{TV}(\phi, f^{CI}) &= \int_{x,y,z} \left| f_{X|Z}(x|z)f_{Y|Z}(y|z)f_Z(z) - f_{X|Z}(x|z)f_Z(z) \int f_{Y|Z}(y|z')f_{Z'|z}(z')dz' \right| dx dy dz \\ &= \int_{x,y,z} f_{X|Z}(x|z)f_{Y|Z}(y|z)f_Z(z) \left| \int \left( 1 - \frac{f_{Y|Z}(y|z')}{f_{Y|Z}(y|z)} \right) f_{Z'|z}(z')dz' \right| dx dy dz \\ &\leq \int_{x,y,z} f_{X|Z}(x|z)f_{Y|Z}(y|z)f_Z(z) \int \left| 1 - \frac{f_{Y|Z}(y|z')}{f_{Y|Z}(y|z)} \right| f_{Z'|z}(z')dz' dx dy dz \\ &= \int_{x,z,z'} f_{X|Z}(x|z)f_Z(z)f_{Z'|z}(z') \left( \int \left| f_{Y|Z}(y|z) - f_{Y|Z}(y|z') \right| dy \right) dz' dx dz \\ &\leq \int_{x,z,\|z'-z\|_2 \leq \epsilon} f_{X|Z}(x|z)f_Z(z)f_{Z'|z}(z') \left( \int \left| f_{Y|Z}(y|z) - f_{Y|Z}(y|z') \right| dy \right) dz' dx dz + \\ &2 \int_{x,z,\|z'-z\|_2 > \epsilon} f_{X|Z}(x|z)f_Z(z)f_{Z'|z}(z') dz' dx dz \\ &\leq \int_{x,z,\|z'-z\|_2 \leq \epsilon} f_{X|Z}(x|z)f_Z(z)f_{Z'|z}(z') \left( \int \left| f_{Y|Z}(y|z) - f_{Y|Z}(y|z') \right| dy \right) dz' dx dz + \\ &2 * \mathbb{P}(\|z' - z\|_2 > \epsilon) \end{aligned} \quad (5)$$

By Pinsker's inequality, we have:

$$\int_y \left| f_{Y|Z}(y|z) - f_{Y|Z}(y|z') \right| dy \leq \sqrt{\frac{1}{2} \int_y \log \frac{f(y|z)}{f(y|z')} f(y|z) dy} \quad (6)$$

By Taylor's expansion with second-order residual, we have:

$$\int \log \frac{f(y|z)}{f(y|z')} f(y|z) dy = \frac{1}{2} (z' - z)^T \mathbf{I}_a(z) (z' - z) \quad (7)$$

for some  $a = \lambda z + (1 - \lambda)z'$  where  $0 \leq \lambda \leq 1$ .

Under Assumption 1 and  $\epsilon < \epsilon_1$  we have,

$$(z' - z)^T \mathbf{I}_a(z)(z' - z) \leq \beta \|z' - z\|_2^2. \quad (8)$$

Then, (8), (7), (6) and (5) imply:

$$2 * d_{TV}(\phi, f^{CI}) \leq \sqrt{\frac{\beta}{4} \mathbb{E}[\|z' - z\|_2 \mathbf{1}_{\|z' - z\|_2 \leq \epsilon}]} + 2\mathbb{P}(\|z' - z\|_2 > \epsilon) \quad (9)$$

We now bound both terms separately. Let  $Z_1, Z_2, \dots, Z_n$  be distributed i.i.d according to  $f(z)$ . Then,  $f_{Z'|z}(\cdot)$  is the pdf of the nearest neighbor of  $z$  among  $Z_1, \dots, Z_n$ .

### A.0.1 Bounding the first term

In this section we will use  $d$  in place of  $d_z$  for notational simplicity. Let  $\gamma_d$  be the volume of the unit  $\ell_2$  ball in dimension  $d$ . Let  $S = \{z : f(z) \geq 2 * c_d \epsilon^2\}$ . This implies, that for  $z \in S$ :

$$f(z) - c_d \epsilon^2 \geq f(z)/2 \quad (10)$$

Let  $Z' = \operatorname{argmin}_{Z_1, Z_2, \dots, Z_n} \|Z_i - z\|_2$  be the random variable which is the nearest neighbor to a point  $z$  among  $n$  i.i.d samples  $Z_i$  drawn from the distribution whose pdf is  $f(z)$  that satisfies assumption 2. Let  $r(z) = \|z - z'\|_2$ . Let  $F(r)$  be the CDF of the random variable  $R$ . Since  $R$  is a non-negative random variable,

$$\mathbb{E}_R[r(z) \mathbf{1}_{r \leq \epsilon}] = \int_{r \leq \epsilon} r dF(r) = [rF(r)]_0^\epsilon - \int_{r \leq \epsilon} F(r) dr \leq \int_{r \leq \epsilon} P(R > r) dr \quad (11)$$

For any  $r \leq \epsilon$ , observe that

$$\begin{aligned} \Pr(R > r) &= \Pr(\nexists i : z_i \in B(z, r)) \\ &= (1 - \Pr(Z \in B(z, r)))^n \\ &\leq \exp(-n\Pr(Z \in B(z, r))) \end{aligned} \quad (12)$$

We have the following chain to bound  $\Pr(Z \in B(z, r))$ . Let  $a = \lambda z + (1 - \lambda)t$ .

$$\begin{aligned} |\Pr(Z \in B(z, r)) - f(z)\gamma_d r^d| &\leq \left| \int_{t \in B(z, r)} (f(t) - f(z)) dt \right| \\ &= \left| \int_{t \in B(z, r)} (\nabla f(z)^T \cdot (t - z) + (t - z)^T H_f(a)(t - z)) dt \right| \\ &\leq \max_{t \in B(z, r)} \|H_f(t)\|_2 \int_{t \in B(z, r)} \|t - z\|_2^2 dt \\ &\leq c_d \gamma_d r^{d+2} \end{aligned} \quad (13)$$

By putting together (11), (12) and (13), we have:

$$\begin{aligned} \mathbb{E}_R[r(z) \mathbf{1}_{r \leq \epsilon}] &\leq \mathbf{1}_{z \in S} \left( \int_{r \leq \epsilon} e^{-n\gamma_d r^d (f(z) - c_d r^2)} dr \right) + \epsilon \mathbf{1}_{z \in S^c} \\ &\leq \mathbf{1}_{z \in S} \left( \int_{r \leq \epsilon} e^{-\frac{1}{2} n\gamma_d f(z) r^d} dr \right) + \epsilon \mathbf{1}_{z \in S^c} \\ &\leq \mathbf{1}_{z \in S} \left( \int_{t \leq \frac{1}{2} n\gamma_d f(z) \epsilon^d} \frac{e^{-t}}{d[\frac{1}{2} n\gamma_d f(z)]^{1/d}} t^{-1+1/d} dt \right) + \epsilon \mathbf{1}_{z \in S^c} \\ &\leq \mathbf{1}_{z \in S} \left( \frac{2^{1/d}}{d(n\gamma_d f(z))^{1/d}} \Gamma(1/d) \right) + \epsilon \mathbf{1}_{z \in S^c} \end{aligned}$$

Therefore, the first term is bounded by:

$$\mathbb{E}[\|z' - z\|_2 \mathbb{1}_{\|z' - z\|_2 \leq \epsilon}] \leq \mathbb{E}_Z [\mathbb{E}_R[r(z) \mathbb{1}_{r \leq \epsilon}]] \quad (14)$$

$$\leq \mathbb{E}_Z \left[ \frac{2^{1/d}}{d(n\gamma_d f(z))^{1/d}} \Gamma(1/d) + \epsilon \mathbb{1}_{z \in S^c} \right] \quad (15)$$

$$\leq \frac{c_3 * 2^{1/d}}{(n\gamma_d)^{1/d} d} \Gamma(1/d) + \epsilon * G(2c_d \epsilon^2) \quad (16)$$

$$(17)$$

### A.0.2 Bounding the second term

We now bound the second term as follows:

$$\begin{aligned} \Pr(\|z - z'\|_2 > \epsilon) &\leq \mathbb{E}_Z [\Pr(R > \epsilon)] \\ &\leq \mathbb{E}_Z \left[ \mathbb{1}_{z \in S} \exp\left(-\frac{n\gamma_d f(z) \epsilon^d}{2}\right) \right] + \Pr(z \in S^c) \\ &\leq \exp(-n\gamma_d c_d \epsilon^{d+2}/2) + G(2c_d \epsilon^2) \end{aligned}$$

Substituting in (9), we have:

$$2 * d_{TV}(g, f^{CI}) \leq \sqrt{\frac{\beta c_3 * 2^{1/d} \Gamma(1/d)}{4} \frac{1}{(n\gamma_d)^{1/d} d}} + \frac{\beta \epsilon G(2c_d \epsilon^2)}{4} + 2 \exp(-n\gamma_d c_d \epsilon^{d+2}/2) + 2G(2c_d \epsilon^2)$$

Substitute  $d_z$  in place of  $d$  to recover Theorem 1.

□

## B Generalization Error Bounds on Classification

In this section, we will prove generalization error bounds for our classification problem in Algorithm 2. Note the samples in  $\mathcal{U}_2'$  are not i.i.d, so standard risk bounds do not hold. We will leverage a spatial near independence property to provide generalization bounds under non-i.i.d samples. In what follows, we will prove the results for any bounded loss function  $L(g(u), \ell) \leq |L|$ . Let  $S \triangleq \mathcal{D}_r$  i.e., the set of training samples. For  $1 \leq i \leq 3$ , let  $\mathcal{Z}_i \triangleq \{z : (x, y, z) \in \mathcal{U}_i\}$ . Let  $\mathcal{Z} \triangleq \mathcal{Z}_1 \cup \mathcal{Z}_2$ . Observe that

$$R_q(g_S) \leq R_q(g_q^*) + 2 \sup_{g \in \mathcal{G}} (R_S(g) - R_q(g)), \quad (18)$$

and hence in the rest of the section we upper bound  $\sup_{g \in \mathcal{G}} (R_S(g) - R_q(g))$ . To this end, we define conditional risk  $R_S(g|\mathcal{Z})$  as

$$R_S(g|\mathcal{Z}) \triangleq \frac{1}{n} \sum_{(u, \ell) \in S} \mathbb{E}[L(g(u), \ell) | \mathcal{Z}].$$

By triangle inequality,

$$\sup_{g \in \mathcal{G}} (R_S(g) - R_q(g)) \leq \sup_{g \in \mathcal{G}} (R_S(g) - R_S(g|\mathcal{Z})) + \sup_{g \in \mathcal{G}} (R_S(g|\mathcal{Z}) - R_q(g)). \quad (19)$$

We first bound the second term in the right hand side of Equation (19) in the next lemma.

**Lemma 1.** *With probability at least  $1 - \delta$ ,*

$$\sup_{g \in \mathcal{G}} (R_S(g|\mathcal{Z}) - R_q(g)) \leq |L|C \sqrt{\frac{V}{n}} + |L| \sqrt{\frac{2 \log(1/\delta)}{n}},$$

where  $V$  is the VC dimension of the classification model.

*Proof.* For a sample  $u = (x, y, z)$ , observe that  $\mathcal{Z} \rightarrow z \rightarrow u$  forms a Markov chain. Hence,

$$\mathbb{E}[L(g(u), \ell) | \mathcal{Z}] = \mathbb{E}[L(g(u), \ell) | Z].$$

Let

$$h(Z) \triangleq \mathbb{E}[L(g(u), \ell) | Z] \quad (20)$$

Hence,

$$R_S(g | \mathcal{Z}) - R_q(g) = \frac{1}{n} \sum_{z \in \mathcal{Z}} h(Z) - \mathbb{E}_q[h(Z)].$$

The above term is the average of  $n$  independent random variables  $h(Z)$  and hence we can apply standard tools from learning theory [4] to obtain

$$\sup_{g \in \mathcal{G}} (R_S(g | \mathcal{Z}) - R_q(g)) \leq |L|C \sqrt{\frac{V_h}{n}} + |L| \sqrt{\frac{2 \log(1/\delta)}{n}},$$

where  $V_h$  is the VC dimension of the class of models of  $h$ . The lemma follows from the fact that VC dimension of  $h$  is smaller than the VC dimension of the underlying classification model.  $\square$

We next bound the first term in the RHS of Equation (19). Proof is given in Appendix B.1.

**Lemma 2.** *Let  $\epsilon > 0$ . If the Hessian of the density  $f(z)$  and the Lipschitz constant of the same is bounded, then with probability at least  $1 - 7\delta$ ,*

$$\begin{aligned} \sup_{g \in \mathcal{G}} (R_S(g) - R_n(g | \mathcal{Z})) &\leq |L| \left( \sqrt{V} + \sqrt{\log \frac{1}{\delta}} \right) \left( \left( \frac{\log(n/\delta)}{n} \right)^{1/3} + \sqrt{\frac{4^d \log(n/\delta) + o_n(1/\epsilon)}{n}} \right) \\ &\quad + |L|G(\epsilon). \end{aligned} \quad (21)$$

Lemmas 1 and 2, together with Equations (18) and (19) yield the following theorem.

**Theorem 3.** *Let  $\epsilon > 0$ . If the Hessian and the Lipschitz constant of  $f(z)$  is bounded, then with probability at least  $1 - 8\delta$ ,*

$$R_q(\hat{g}) \leq R_q(g_q^*) + c|L| \left( \left( \sqrt{V} + \sqrt{\log \frac{1}{\delta}} \right) \left( \left( \frac{\log(n/\delta)}{n} \right)^{1/3} + \sqrt{\frac{4^d \log(n/\delta) + o_n(1/\epsilon)}{n}} \right) + G(\epsilon) \right), \quad (22)$$

where  $c$  is a universal constant and  $\hat{g}$  is the minimizer in Step 6 of Algorithm 2.

### B.1 Proof of Lemma 2

We need few definitions to prove Lemma 2. For a point  $z$ , let  $B_n(z)$  be a ball around it such that

$$\Pr_{Z \sim f(z)} (Z \in B_n(z)) = \frac{\log \frac{n^2}{\delta}}{n} \triangleq \alpha_n.$$

Intuitively, with high probability the nearest neighbor of each sample  $z$  lies in  $B_n(z)$ . We formalize it in the next lemma.

**Lemma 3.** *With probability  $> 1 - \delta$ , the nearest neighbor of each sample  $z \in \mathcal{Z}_2$  in  $\mathcal{Z}_3$  lie in  $B(z)$ .*

*Proof.* The probability that none of  $\mathcal{Z}_3$  appears in  $B(z)$  is  $1 - (1 - \alpha_n)^n \leq \delta/n$ . The lemma follows by the union bound.  $\square$

We now bound the probability that the nearest neighbor balls  $B_n()$  intersect for two samples.

**Lemma 4.** *Let  $\epsilon > 0$ . If the Hessian of the density ( $f(z)$ ) is bounded by  $c$  and the Lipschitz constant is bounded by  $\gamma$ , then for any given  $z_1$  such that  $f(z_1) \geq \epsilon$  and a sample  $z_2 \sim f$ ,*

$$\Pr_{z_2 \sim f} (B_n(z_1) \cap B_n(z_2) \neq \emptyset) \leq \beta_n \triangleq 4^d \alpha_n (1 + o_n(1/\epsilon)).$$

*Proof.* Let  $r_n(z)$  denote the radius of  $B_n(z)$ . Let  $B(z, r)$  denote the ball of radius  $r$  around  $z$  and  $V(z, r)$  be its volume. We can rewrite  $\beta_n$  as

$$\begin{aligned} &= \Pr(B_n(z_1) \cap B_n(z_2) \neq \emptyset) \\ &= \Pr(B_n(z_1) \cap B_n(z_2) \neq \emptyset, 3r_n(z_1) \geq r_n(z_2)) + \Pr(B_n(z_1) \cap B_n(z_2) \neq \emptyset, 3r_n(z_1) < r_n(z_2)). \end{aligned}$$

We first bound the first term. Note that

$$\int_{z' \in B_n(z)} f(z') dz' = \alpha_n,$$

Hence, by Taylor's series expansion and the bound on Hessian yields,

$$\alpha_n = \int_{z' \in B_n(z)} f(z') dz' = V(z, r_n(z)) (f(z) + O(r_n^2(z)c)).$$

Similarly,

$$\begin{aligned} \Pr(z' \in V(z, 4r_n(z))) &= V(z, 4r_n(z)) (f(z) + O(9r_n^2(z)c)) \\ &= 4^d \alpha_n (1 + o_n(1/\epsilon)), \end{aligned}$$

where the last equality follows from the fact that  $V(z, 4r_n(z))/V(z, r_n(z)) = 4^d$  in  $d$  dimensions.

Then the first term can be bounded as

$$\begin{aligned} \Pr(B_n(z_1) \cap B_n(z_2) \neq \emptyset, 3r_n(z_1) \geq r_n(z_2)) &= \Pr(z_2 \in B(z_1, r_n(z_1) + r_n(z_2)), 3r_n(z_1) \geq r_n(z_2)) \\ &\leq \Pr(z_2 \in B(z_1, 4r_n(z_1)), 3r_n(z_1) \geq r_n(z_2)) \\ &\leq \Pr(z_2 \in B(z_1, 4r_n(z_1))) \\ &\leq 4^d \alpha_n (1 + o_n(1/\epsilon)). \end{aligned}$$

To bound the second term, observe that if  $B_n(z_1) \cap B_n(z_2) \neq \emptyset$  and  $3r_n(z_1) < r_n(z_2)$ . There exists a point  $z'$  on the line joining  $z_1$  and  $z_2$  at distance  $3r_n(z_1)$  from  $z_1$  such that

$$\Pr(z'' \in B(z', 3r_n(z_1))) < \alpha_n.$$

As before bound on the Hessian yields,

$$\alpha_n > V(z', 3r_n(z_1)) (f(z') - O(9r_n^2(z_1)c)).$$

Hence,

$$f(z') < 3^{-d} (f(z) + O(r_n^2(z)c)) + O(9r_n^2(z_1)c).$$

However,  $f(z) > \epsilon$  and  $f(z') \geq f(z) - 3r_n(z_1)\gamma$  and  $r_n(z_1) \rightarrow 0$ . Hence, a contradiction. Thus

$$\Pr(B_n(z_1) \cap B_n(z_2) \neq \emptyset, 3r_n(z_1) < r_n(z_2)) = 0.$$

□

Consider the graph on indices  $[n]$ , such that two indices are connected if and only if  $B_n(z_i) \cap B_n(z_j) \neq \emptyset$ ,  $f(z_1) \geq \epsilon$ ,  $f(z_2) \geq \epsilon$ . Let  $\Delta(Z_1^n)$  be the maximum degree of the resulting graph. We first show that the maximum degree of this graph is small.

**Lemma 5.** *With probability  $\geq 1 - \delta$ ,*

$$\Delta(Z_1^n) \leq 4n\beta_n.$$

*Proof.* For index 1, by Lemma 4 that probability of  $j$  points intersect is at most

$$\sum_{i=0}^j \binom{n}{i} \beta_n^i (1 - \beta_n)^{n-i}.$$

Hence, the degree of vertex 1 is dominated by a binomial distribution with parameters  $n$  and  $\beta_n$ . The lemma follows from the union bound and the Chernoff bound. □

Let  $k > 2\Delta(Z_1^n)$  and  $S_0, S_1, S_2 \dots S_k$  be  $k$  independent sets of the above graph such that  $\max_{t \geq 1} |S_t| \leq 2n/k$ . Note that such independent sets exists by Lemma 10. We set the exact value of  $k$  later. Let  $S_0$  contains all indices such that  $f(z_i) < \epsilon$ .

**Lemma 6.** *With probability  $> 1 - \delta$ ,*

$$|S_0| \leq nG(\epsilon) + \sqrt{n \log \frac{1}{\delta}}.$$

*Proof.* Observe that  $|S_0|$  is the sum of  $n$  independent random variables and changing any of them changes  $S_0$  by at most 1. The lemma follows by McDiarmid's inequality.  $\square$

We can upper bound the LHS in Equation (21) as

$$\sup_{g \in \mathcal{G}} (R_S(g) - R_n(g|\mathcal{Z})) \leq \sum_{t=1}^k \frac{|S_t|}{n} \sup_{g \in \mathcal{G}} \frac{1}{|S_t|} \sum_{i \in S_t} (L(g(u_i), \ell_i) - h(Z_i)) + \frac{|S_0|}{n} |L|.$$

Let  $N(Z_i)$  denote the number of elements of  $\mathcal{Z}_3$  that are in  $B(Z_i)$  and Let  $A_i$  be always true if  $Z_i \in \mathcal{Z}_1$  and otherwise  $A_i$  be the event such that nearest neighbor of samples in  $N(Z_i) > 0$ . We first show the following inequality.

**Lemma 7.** *With probability  $\geq 1 - \delta$ , for all sets  $S_t$ .*

$$\sup_{g \in \mathcal{G}} \frac{1}{|S_t|} \sum_{i \in S_t} (L(g(u_i), \ell_i) - h(Z_i)) = \sup_{g \in \mathcal{G}} \frac{1}{|S_t|} \sum_{i \in S_t} 1_{A_i} (L(g(u_i), \ell_i) - h(Z_i)).$$

*Proof.* Let  $X_i = (L(g(u_i), \ell_i) - h(Z_i))$  and Observe that LHS can be written as

$$\sup_{g \in \mathcal{G}} \frac{1}{|S_t|} \sum_{i \in S_t} X_i = \sup_{g \in \mathcal{G}} \frac{1}{|S_t|} \sum_{i \in S_t} X_i 1_{A_i} + \sup_{g \in \mathcal{G}} \frac{1}{|S_t|} \sum_{i \in S_t} (X_i - X_i 1_{A_i}).$$

If the conditions of Lemma 3 hold, the nearest sample of  $Z_i$ 's lie within  $B_n(Z_i)$ . Hence, with probability  $\geq 1 - \delta$ , the second term is 0. Hence the lemma.  $\square$

Let  $r$  be defined as follows.

$$r(Z_i, N_i) \triangleq \mathbb{E}[1_{A_i} (L(g(u_i), \ell_i) - h(Z_i)) | N(Z_i) = N_i].$$

Observe that

$$\begin{aligned} & \mathbb{E} \left[ \sum_{i \in S_t} 1_{A_i} (L(g(u_i), \ell_i) - h(Z_i)) | N(Z_1), \dots, N(Z_n) \right] \\ &= \sum_{i \in S_t} \mathbb{E} [1_{A_i} (L(g(u_i), \ell_i) - h(Z_i)) | N(Z_1), \dots, N(Z_n)] \\ &= \sum_{i \in S_t} \mathbb{E} [1_{A_i} (L(g(u_i), \ell_i) - h(Z_i)) | N(Z_i)] \\ &= \sum_{i \in S_t} r(Z_i, N_i). \end{aligned} \tag{23}$$

Hence, we can split the term as

$$\begin{aligned} & \sup_{g \in \mathcal{G}} \frac{1}{|S_t|} \sum_{i \in S_t} 1_{A_i} (L(g(u_i), \ell_i) - h(Z_i)) \\ & \leq \sup_{g \in \mathcal{G}} \frac{1}{|S_t|} \sum_{i \in S_t} 1_{A_i} (L(g(u_i), \ell_i) - r(Z_i, N(Z_i))) + \sup_{g \in \mathcal{G}} \frac{1}{|S_t|} \sum_{i \in S_t} 1_{A_i} (r(Z_i, N(Z_i)) - h(Z_i)) \end{aligned} \tag{24}$$

Given  $\{Z_i, N(Z_i)\}$ , the first term in the RHS of the Equation (24) is a function of  $|S_t|$  independent random variables as  $1_{A_i} * L(g(u_i), \ell_i)$  are mutually independent given  $\{Z_i, N(Z_i)\}$ . Thus we can

use standard tools from VC dimension theory and state that with probability  $\geq 1 - \delta$ , the first term in the RHS of Equation (24) can be upper bounded as

$$\sup_{g \in \mathcal{G}} \frac{1}{|S_t|} \sum_{i \in S_t} 1_{A_i} (L(g(u_i), \ell_i) - r(Z_i, N(Z_i))) \leq |L|C \sqrt{\frac{V}{|S_t|}} + |L| \sqrt{\frac{\log(1/\delta)}{|S_t|}}.$$

conditioned on  $\{Z_i, N(Z_i)\}$

To bound the second term in the RHS of Equation (24), observe that unlike the first term, the  $N(Z_i)$ s are dependent on each other. However note that  $N(Z_1), \dots, N(Z_{|S_t|})$  are distributed according to multinomial distribution with parameters  $n$  and  $\alpha_n$ . However, if we replace them by independent Poisson distributed  $N(Z_i)$ s we expect the value not to change. We formalize it by total variation distance. By Lemma 9, the total variation distance between a multinomial distribution and product of Poisson distributions is

$$\mathcal{O}(|S_t| \alpha_n),$$

and hence any bound holds in the second distribution holds in the first one with an additional penalty of

$$\mathcal{O}(|S_t| \alpha_n |L|).$$

Under the new independent sampling distribution, again the samples are independent and we can use standard tools from VC dimension and hence, with probability  $\geq 1 - \delta$ , the term is upper bounded by

$$|L|C \sqrt{\frac{V}{|S_t|}} + |L| \sqrt{\frac{\log(1/\delta)}{|S_t|}}.$$

Hence, summing over all the bounds, we get

$$\begin{aligned} \sup_{g \in \mathcal{G}} (R_S(g) - R_n(g|Z)) &\leq |L| \mathcal{O} \left( \frac{|S_0|}{n} + \sum_{t=1}^k \frac{|S_t|}{n} \left( \sqrt{\frac{\log \frac{1}{\delta}}{|S_t|}} + c \sqrt{\frac{V}{|S_t|}} + \alpha_n |S_t| \right) \right) \\ &\leq |L| \mathcal{O} \left( G(\epsilon) + \sqrt{\frac{k}{n}} \left( \sqrt{\log \frac{1}{\delta}} + c \sqrt{V} \right) + \alpha_n \max_t |S_t| + \sqrt{\frac{\log \frac{1}{\delta}}{n}} \right) \\ &\leq |L| \mathcal{O} \left( \sqrt{\frac{k}{n}} \left( \sqrt{\log \frac{1}{\delta}} + c \sqrt{V} \right) + \alpha_n \frac{n}{k} + \sqrt{\frac{\log \frac{1}{\delta}}{n}} \right). \end{aligned}$$

conditioned on  $Z_i, N(Z_i)$  Choose  $k = n\alpha_n^{2/3} + 8n\beta_n$ , and note that the conditioning can be removed as the term on the r.h.s are constants. This yields the result. The error probability follows by the union bound.

**Theorem 4.** Assume the conditions for Theorem 3. Suppose the loss is  $L(g(u), \ell) = \mathbb{1}_{g(u) \neq \ell}$  (s.t  $|L| \leq 1$ ). Further suppose the class of classifying function is such that  $R_q(g_q^*) \leq r_0 + \eta$ . Here,  $r_0 \triangleq 0.5(1 - d_{TV}(q(x, y, z|1), q(x, y, z|0)))$  is the risk of the Bayes optimal classifier when  $\mathbb{P}(\ell = 1) = \mathbb{P}(\ell = 0)$ . This is the best loss that any classifier can achieve for this classification problem [4]. Under this setting, w.p at least  $1 - 8\delta$  we have:

$$\frac{1}{2} (1 - d_{TV}(f, f^{CI})) - \frac{b(n)}{2} \leq R_q(g_S) \leq \frac{1}{2} (1 - d_{TV}(f, f^{CI})) + \frac{b(n)}{2} + \eta + \gamma_n$$

*Proof.* Assume the bounds of Theorem 3 holds which happens w.p at least  $1 - 8\delta$ . From Theorem 3 we have that

$$R_q(g_S) \leq R_q(g_q^*) + \gamma_n. \quad (25)$$

Also, note that from Theorem 1 we have the following:

$$\begin{aligned} d_{TV}(q(x, y, z|1), q(x, y, z|0)) &= d_{TV}(\phi, f) \\ &\leq d_{TV}(\phi, f^{CI}) + d_{TV}(f^{CI}, f) \\ &\leq b(n) + d_{TV}(f^{CI}, f) \end{aligned} \quad (26)$$

Under our assumption we have  $R_q(g_q^*) \leq r_0 + \eta$ . Combining this with (25) and (26) we get the r.h.s. For, the l.h.s note that  $R_q(g_q^*) \geq r_0$  as the bayes optimal classifier has the lowest risk. We can now use (26) to prove the l.h.s.  $\square$

## C Tools from probability and graph theory

**Lemma 8** (McDiarmid's inequality [20]). *Let  $X_1, X_2, \dots, X_m$  be  $m$  independent random variables and  $f$  be a function from  $x_1^n \rightarrow \mathbb{R}$  such that changing any one of the  $X_i$ s changes the function  $f$  at most by  $c_i$ , then*

$$\Pr(f - \mathbb{E}[f] \geq \epsilon) \leq \exp\left(\frac{-2\epsilon^2}{\sum_{i=1}^m c_i^2}\right).$$

**Lemma 9** (Special case of Theorem 1 in [25]). *Let  $f_m$  be the multinomial distribution with parameters  $n$  and  $p_1, p_2, \dots, p_k, 1 - \sum_{i=1}^k p_i$ , and  $f_p$  be the product of Poisson distributions with mean  $np_i$  for  $i = 1 \leq k$ , then*

$$d_{TV}(f_m, f_p) \leq 8.8 \sum_{i=1}^k p_i.$$

**Lemma 10.** *For a graph with maximum degree  $\Delta$ , there exists a set of independent sets  $S_1, S_2, \dots, S_k$  such that  $k \geq 2\Delta$  and*

$$\max_{1 \leq i \leq k} |S_i| \leq 2n/k.$$

*Proof.* We show that the following algorithm yields a coloring (and hence independent sets) with the required property.

Let  $1, 2, \dots, k$  be  $k$  colors, where  $k > 2\Delta$ . We arbitrarily order the nodes, and sequentially color nodes with a currently least used color from among the ones not used by its neighbors. Consider the point in time when  $i$  nodes have been colored, and we evaluate the options for the  $(i+1)^{th}$  node. The number of possible choices of color for that node is  $c \geq k - \Delta$ . Out these  $c$  colors, the average number of nodes belonging to each color at this point is at-most  $i/c$ . Therefore by pigeonholing, the minimum is less than the average; thus the number of nodes belonging to chosen color is no larger than  $i/c \leq i/(k - \Delta)$ .

Hence at the end when all  $n$  nodes are colored, each color has been used no more than  $(n-1)/(k - \Delta) + 1 < 2n/k$ .  $\square$
